# Supplementary material for: High frequency of +1 programmed ribosomal frameshifting in Euplotes octocarinatus
Source: PubMed Central journal article supplement (PMC4759687; doi:10.1038/srep21139), 2016-02-19
Supplement: srep21139-s1.pdf [file srep21139-s1.pdf]

# High frequency of +1 programmed ribosomal frameshifting in

## *Euplotes octocarinatus*

Ruanlin Wang<sup>1</sup>, Jie Xiong<sup>2</sup>, Wei Wang<sup>1</sup>, Wei Miao<sup>2</sup> and Aihua Liang<sup>1\*</sup>

<sup>1</sup>Key Laboratory of Chemical Biology and Molecular Engineering of Ministry of Education, Institute of Biotechnology, Shanxi University, Taiyuan 030006, China.

<sup>2</sup>Key Laboratory of Aquatic Biodiversity and Conservation, Institute of Hydrobiology, Chinese Academy of Sciences, Wuhan 430072, China.

\* Corresponding author: Aihua Liang

e-mail: [aliantg@sxu.edu.cn](mailto:aliantg@sxu.edu.cn).

Tel.: +86-351-7018731

Fax.: +86-351-7011499

Running title: programmed ribosomal frameshifting in *Euplotes octocarinatus*

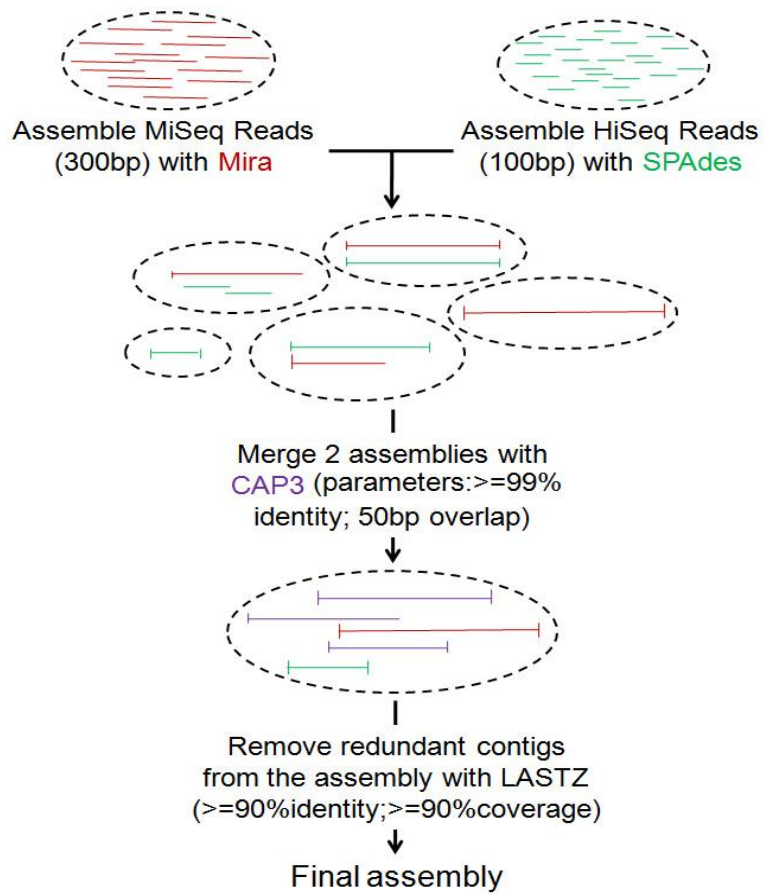

**Figure S1. Genome assembly pipeline.**

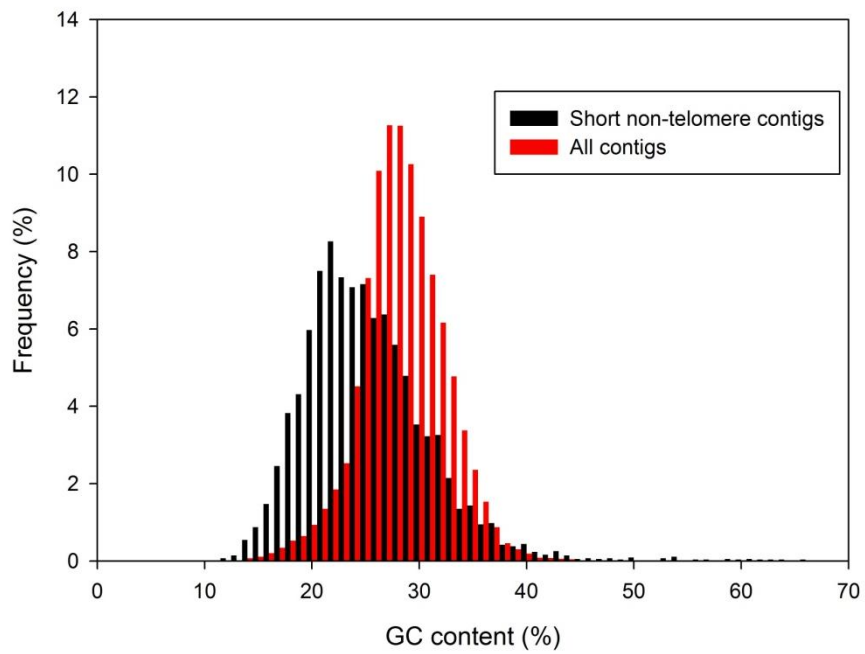

**Figure S2. GC content of redundant “chaff” contigs.** The black and red bars indicate non-telomere contigs (shorter than 500 bp, 5,494 in total) and all contigs (41,980 in total), respectively.

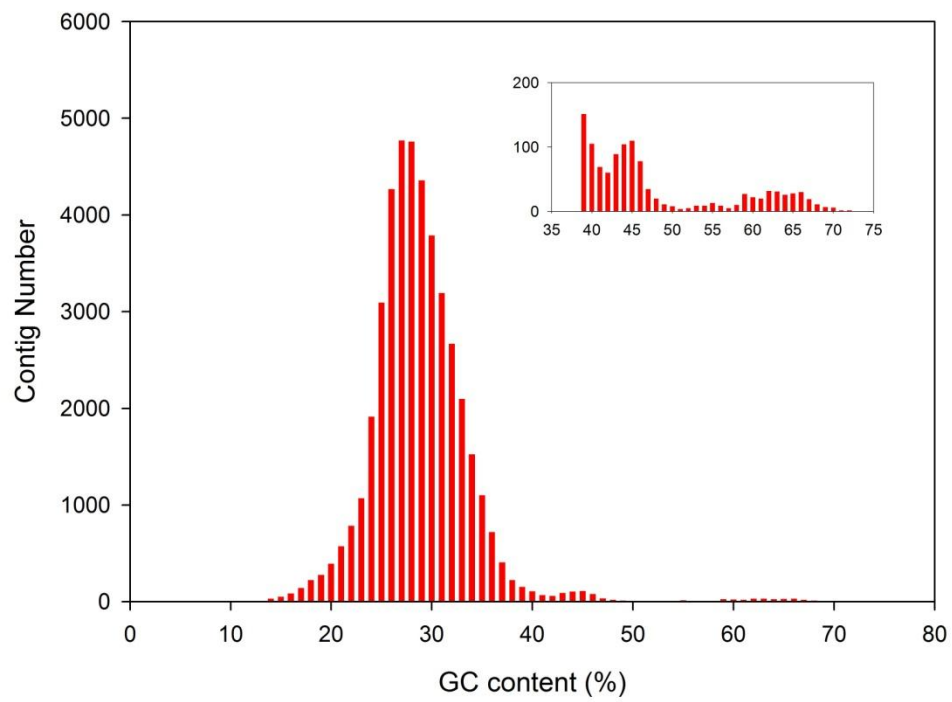

**Figure S3. GC content of all contigs.** Percentage of GC content is plotted against the number of contigs to show that some sub-peaks are located behind the major peak.

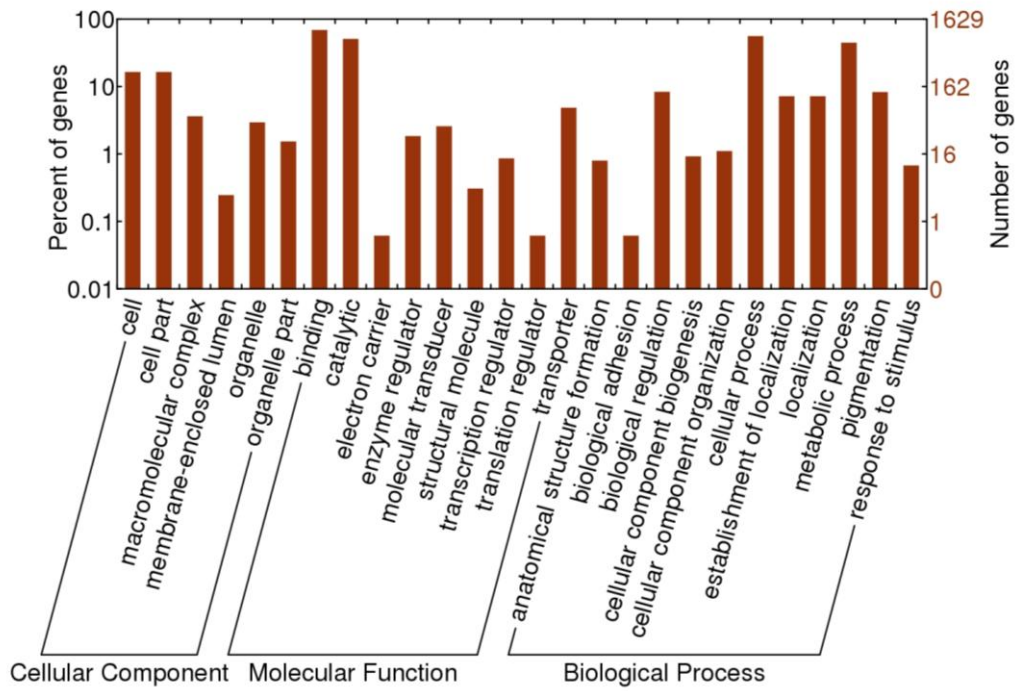

**Figure S4. GO categories of the PRF transcripts.** The results are summarized in three main categories: biological process, cellular component and molecular function. The y-axis on the right indicates the number of genes in a category. The y-axis on the left indicates the percentage of a specific category of genes in that main category.

**Table S1. Parameters of genome sequencing of *Euplotes octocarinatus***

| <b>Property</b> | <b>Sequencing Platform</b> | <b>Insert size (bp)</b> | <b>Read Length (bp)</b> | <b>Total Sequences</b> | <b>%GC</b> | <b>Data Size (Gb)</b> |
|-----------------|----------------------------|-------------------------|-------------------------|------------------------|------------|-----------------------|
| MiSeq reads     | Illumina MiSeq             | 500                     | 300×2                   | 28,684,752             | 31         | 8.58                  |
| HiSeq reads     | Illumina HiSeq 2000        | 180                     | 100×2                   | 26,811,500             | 29         | 2.68                  |
| <b>Total</b>    |                            |                         |                         |                        |            | ~ 11Gb                |

**Table S2. Statistic of novel slippery sequences.**

| <b>Slippery sequence</b> | <b>Occurrence</b> | <b>Percentage (%)</b> |
|--------------------------|-------------------|-----------------------|
| TTTTAR                   | 54                | 24.22                 |
| AAGTAR                   | 41                | 18.39                 |
| AATTAR                   | 29                | 13.00                 |
| ATTTAR                   | 28                | 12.56                 |
| ACCTAR                   | 10                | 4.48                  |
| AACTAR                   | 6                 | 2.69                  |
| CTTTAR                   | 5                 | 2.24                  |
| TCATAA                   | 4                 | 1.79                  |
| GAATAR                   | 3                 | 1.35                  |
| GGGTAA                   | 3                 | 1.35                  |
| ACATAR                   | 2                 | 0.90                  |
| ACTTAA                   | 2                 | 0.90                  |
| AGATAR                   | 2                 | 0.90                  |
| AGCTAA                   | 2                 | 0.90                  |
| CAATAA                   | 2                 | 0.90                  |
| GATTAA                   | 2                 | 0.90                  |
| GCCTAR                   | 2                 | 0.90                  |
| GTTTAG                   | 2                 | 0.90                  |
| TATTAR                   | 3                 | 1.35                  |
| TGATAA                   | 2                 | 0.90                  |
| TGGTAG                   | 2                 | 0.90                  |
| TTCTAA                   | 2                 | 0.90                  |
| AGGTAA                   | 1                 | 0.45                  |
| ATGTAA                   | 1                 | 0.45                  |
| CCATAA                   | 1                 | 0.45                  |
| CGATAA                   | 1                 | 0.45                  |
| CGTTAA                   | 1                 | 0.45                  |
| GAATAA                   | 1                 | 0.45                  |
| GGCTAG                   | 1                 | 0.45                  |
| GTATAG                   | 1                 | 0.45                  |
| TCCTAA                   | 1                 | 0.45                  |
| TGCTAA                   | 1                 | 0.45                  |
| TTATAA                   | 1                 | 0.45                  |
| TTGTAA                   | 1                 | 0.45                  |
| ATATAA                   | 1                 | 0.45                  |
| ATCTAA                   | 1                 | 0.45                  |
| TTATAA                   | 1                 | 0.45                  |

**Table S4. The Pfam domain search of PRF transcripts**

| <b>Domain accession</b> | <b>Domain name</b> | <b>Occurrence</b> |
|-------------------------|--------------------|-------------------|
| PF00069.20              | Pkinase            | 362               |
| PF02493.15              | MORN               | 265               |
| PF00400.27              | WD40               | 179               |
| PF07004.7               | SHIPPO-rpt         | 146               |
| PF00027.24              | cNMP_binding       | 130               |
| PF13499.1               | EF-hand_7          | 91                |
| PF13948.1               | DUF4215            | 72                |
| PF13516.1               | LRR_6              | 64                |
| PF03133.10              | TTL                | 62                |
| PF00415.13              | RCC1               | 62                |
| PF00225.18              | Kinesin            | 57                |
| PF12796.2               | Ank_2              | 48                |
| PF00520.26              | Ion_trans          | 46                |
| PF02518.21              | HATPase_c          | 44                |
| PF00512.20              | HisKA              | 38                |
| PF01344.20              | Kelch_1            | 36                |
| PF00071.17              | Ras                | 33                |
| PF13414.1               | TPR_11             | 29                |
| PF00806.14              | PUF                | 29                |
| PF00481.16              | PP2C               | 28                |
| PF00612.22              | IQ                 | 28                |
| PF01529.15              | zf-DHHC            | 27                |
| PF00443.24              | UCH                | 26                |
| PF00566.13              | RabGAP-TBC         | 26                |
| PF00498.21              | FHA                | 26                |
| PF00515.23              | TPR_1              | 25                |
| PF00782.15              | DSPc               | 25                |
| PF00643.19              | zf-B_box           | 24                |
| PF13833.1               | EF-hand_8          | 24                |
| PF13415.1               | Kelch_3            | 23                |
| PF00005.22              | ABC_tran           | 23                |
| PF13418.1               | Kelch_4            | 22                |
| PF12906.2               | RINGv              | 20                |
| PF00153.22              | Mito_carr          | 20                |
| PF00787.19              | PX                 | 19                |
| PF13405.1               | EF-hand_6          | 19                |
| PF08238.7               | Sell               | 18                |
| PF00246.19              | Peptidase_M14      | 18                |
| PF07690.11              | MFS_1              | 18                |
| PF00664.18              | ABC_membrane       | 18                |
| PF00096.21              | zf-C2H2            | 17                |
| PF00271.26              | Helicase_C         | 17                |
| PF03031.13              | NIF                | 16                |
| PF01485.16              | IBR                | 16                |



|            |                 |    |
|------------|-----------------|----|
| PF00168.25 | C2              | 16 |
| PF12770.2  | CHAT            | 15 |
| PF13879.1  | KIAA1430        | 14 |
| PF13639.1  | zf-RING_2       | 13 |
| PF06337.7  | DUSP            | 13 |
| PF00226.26 | DnaJ            | 13 |
| PF07885.11 | Ion_trans_2     | 12 |
| PF00122.15 | E1-E2_ATPase    | 11 |
| PF00091.20 | Tubulin         | 10 |
| PF13424.1  | TPR_12          | 10 |
| PF00083.19 | Sugar_tr        | 10 |
| PF08016.7  | PKD_channel     | 10 |
| PF00169.24 | PH              | 10 |
| PF00768.15 | Peptidase_S11   | 10 |
| PF00648.16 | Peptidase_C2    | 10 |
| PF00931.17 | NB-ARC          | 10 |
| PF00249.26 | Myb_DNA-binding | 10 |
| PF13921.1  | Myb_DNA-bind_6  | 10 |
| PF14580.1  | LRR_9           | 10 |
| PF12799.2  | LRR_4           | 10 |
| PF02141.16 | DENN            | 10 |
| PF00004.24 | AAA             | 10 |
| PF07719.12 | TPR_2           | 9  |
| PF00076.17 | RRM_1           | 9  |
| PF13855.1  | LRR_8           | 9  |
| PF02263.14 | GBP             | 9  |
| PF13637.1  | Ank_4           | 9  |
| PF01490.13 | Aa_trans        | 9  |
| PF13913.1  | zf-C2HC_2       | 8  |
| PF01504.13 | PIP5K           | 8  |
| PF00454.22 | PI3_PI4_kinase  | 8  |
| PF00702.21 | Hydrolase       | 8  |
| PF00211.15 | Guanylate_cyc   | 8  |
| PF00270.24 | DEAD            | 8  |
| PF00650.15 | CRAL_TRIO       | 8  |
| PF12695.2  | Abhydrolase_5   | 8  |
| PF07728.9  | AAA_5           | 8  |
| PF02176.13 | zf-TRAF         | 7  |
| PF00097.20 | zf-C3HC4        | 7  |
| PF13181.1  | TPR_8           | 7  |
| PF07534.11 | TLD             | 7  |
| PF01926.18 | MMR_HSR1        | 7  |
| PF00149.23 | Metallophos     | 7  |
| PF01661.16 | Macro           | 7  |
| PF04408.18 | HA2             | 7  |
| PF02841.9  | GBP_C           | 7  |

|            |                 |   |
|------------|-----------------|---|
| PF00036.27 | EF-hand_1       | 7 |
| PF13863.1  | DUF4200         | 7 |
| PF07002.11 | Copine          | 7 |
| PF01067.17 | Calpain_III     | 7 |
| PF00023.25 | Ank             | 7 |
| PF00022.14 | Actin           | 7 |
| PF00098.18 | zf-CCHC         | 6 |
| PF01496.14 | V_ATPase_I      | 6 |
| PF03953.12 | Tubulin_C       | 6 |
| PF13540.1  | RCC1_2          | 6 |
| PF00659.13 | POLO_box        | 6 |
| PF01237.13 | Oxysterol_BP    | 6 |
| PF07717.11 | OB_NTP_bind     | 6 |
| PF01909.18 | NTP_transf_2    | 6 |
| PF12777.2  | MT              | 6 |
| PF13854.1  | Kelch_5         | 6 |
| PF03372.18 | Exo_endo_phos   | 6 |
| PF05708.7  | DUF830          | 6 |
| PF05057.9  | DUF676          | 6 |
| PF03142.10 | Chitin_synth_2  | 6 |
| PF00439.20 | Bromodomain     | 6 |
| PF07707.10 | BACK            | 6 |
| PF01603.15 | B56             | 6 |
| PF07859.8  | Abhydrolase_3   | 6 |
| PF12774.2  | AAA_6           | 6 |
| PF13465.1  | zf-H2C2_2       | 5 |
| PF13920.1  | zf-C3HC4_3      | 5 |
| PF04564.10 | U-box           | 5 |
| PF01167.13 | Tub             | 5 |
| PF01131.15 | Topoisom_bac    | 5 |
| PF01833.19 | TIG             | 5 |
| PF00072.19 | Response_reg    | 5 |
| PF05193.16 | Peptidase_M16_C | 5 |
| PF00233.14 | PDEase_I        | 5 |
| PF00892.15 | EamA            | 5 |
| PF08393.8  | DHC_N2          | 5 |
| PF00134.18 | Cyclin_N        | 5 |
| PF03556.10 | Cullin_binding  | 5 |
| PF00888.17 | Cullin          | 5 |
| PF03493.13 | BK_channel_a    | 5 |
| PF03747.9  | ADP_ribosyl_GH  | 5 |
| PF12781.2  | AAA_9           | 5 |
| PF12775.2  | AAA_7           | 5 |
| PF13401.1  | AAA_22          | 5 |
| PF00642.19 | zf-CCCH         | 4 |
| PF13894.1  | zf-C2H2_4       | 4 |

|            |                 |   |
|------------|-----------------|---|
| PF13768.1  | VWA_3           | 4 |
| PF01505.13 | Vault           | 4 |
| PF01751.17 | Toprim          | 4 |
| PF03638.10 | TCR             | 4 |
| PF00176.18 | SNF2_N          | 4 |
| PF00160.16 | Pro_isomerase   | 4 |
| PF00613.15 | PI3Ka           | 4 |
| PF03416.14 | Peptidase_C54   | 4 |
| PF04928.12 | PAP_central     | 4 |
| PF08030.7  | NAD_binding_6   | 4 |
| PF05729.7  | NACHT           | 4 |
| PF00560.28 | LRR_1           | 4 |
| PF13246.1  | Hydrolase_like2 | 4 |
| PF03451.9  | HELP            | 4 |
| PF12710.2  | HAD             | 4 |
| PF08022.7  | FAD_binding_8   | 4 |
| PF13202.1  | EF-hand_5       | 4 |
| PF03028.10 | Dynein_heavy    | 4 |
| PF14825.1  | DUF4483         | 4 |
| PF11822.3  | DUF3342         | 4 |
| PF06294.6  | DUF1042         | 4 |
| PF08613.6  | Cyclin          | 4 |
| PF01556.13 | CTDII           | 4 |
| PF04053.9  | Coatmer_WDAD    | 4 |
| PF12348.3  | CLASP_N         | 4 |
| PF00689.16 | Cation_ATPase_C | 4 |
| PF02214.17 | BTB_2           | 4 |
| PF00651.26 | BTB             | 4 |
| PF02138.13 | Beach           | 4 |
| PF00025.16 | Arf             | 4 |
| PF04547.7  | Anoctamin       | 4 |
| PF00155.16 | Aminotran_1_2   | 4 |
| PF00107.21 | ADH_zinc_N      | 4 |
| PF08240.7  | ADH_N           | 4 |
| PF12780.2  | AAA_8           | 4 |
| PF00300.17 | His_Phos_1      | 3 |
| PF10257.4  | RAI16-like      | 3 |
| PF00102.22 | Y_phosphatase   | 3 |
| PF00654.15 | Voltage_CLC     | 3 |
| PF02151.14 | UVR             | 3 |
| PF01205.14 | UPF0029         | 3 |
| PF02254.13 | TrkA_N          | 3 |
| PF13374.1  | TPR_10          | 3 |
| PF07202.8  | Tcp10_C         | 3 |
| PF00464.14 | SHMT            | 3 |
| PF04091.7  | Sec15           | 3 |

|            |                 |   |
|------------|-----------------|---|
| PF14259.1  | RRM_6           | 3 |
| PF08646.5  | Rep_fac-A_C     | 3 |
| PF10262.4  | Rdx             | 3 |
| PF10409.4  | PTEN_C2         | 3 |
| PF07714.12 | Pkinase_Tyr     | 3 |
| PF00433.19 | Pkinase_C       | 3 |
| PF02887.11 | PK_C            | 3 |
| PF00224.16 | PK              | 3 |
| PF01433.15 | Peptidase_M1    | 3 |
| PF05048.8  | NosD            | 3 |
| PF00175.16 | NAD_binding_1   | 3 |
| PF06017.8  | Myosin_TH1      | 3 |
| PF09139.6  | Mmp37           | 3 |
| PF01875.12 | Memo            | 3 |
| PF02373.17 | JmjC            | 3 |
| PF08412.5  | Ion_trans_N     | 3 |
| PF00012.15 | HSP70           | 3 |
| PF00505.14 | HMG_box         | 3 |
| PF00328.17 | His_Phos_2      | 3 |
| PF00632.20 | HECT            | 3 |
| PF00009.22 | GTP_EFTU        | 3 |
| PF00982.16 | Glyco_transf_20 | 3 |
| PF02212.13 | GED             | 3 |
| PF01363.16 | FYVE            | 3 |
| PF01846.14 | FF              | 3 |
| PF01794.14 | Ferric_reduct   | 3 |
| PF12807.2  | eIF3_p135       | 3 |
| PF02319.15 | E2F_TDP         | 3 |
| PF01031.15 | Dynamin_M       | 3 |
| PF02714.10 | DUF221          | 3 |
| PF03455.14 | dDENN           | 3 |
| PF01266.19 | DAO             | 3 |
| PF10557.4  | Cullin_Nedd8    | 3 |
| PF06957.6  | COPI_C          | 3 |
| PF13236.1  | CLU             | 3 |
| PF10607.4  | CLTH            | 3 |
| PF01644.12 | Chitin_synth_1  | 3 |
| PF00686.14 | CBM_20          | 3 |
| PF00339.24 | Arrestin_N      | 3 |
| PF00501.23 | AMP-binding     | 3 |
| PF14739.1  | DUF4472         | 2 |
| PF00569.12 | ZZ              | 2 |
| PF13445.1  | zf-RING_UBOX    | 2 |
| PF00641.13 | zf-RanBP        | 2 |
| PF02891.15 | zf-MIZ          | 2 |
| PF14260.1  | zf-C4pol        | 2 |

|            |                 |   |
|------------|-----------------|---|
| PF03366.11 | YEATS           | 2 |
| PF00752.12 | XPG_N           | 2 |
| PF08774.6  | VRR_NUC         | 2 |
| PF00790.14 | VHS             | 2 |
| PF10595.4  | UPF0564         | 2 |
| PF00789.15 | UBX             | 2 |
| PF00240.18 | ubiquitin       | 2 |
| PF02134.16 | UBACT           | 2 |
| PF00133.17 | tRNA-synt_1     | 2 |
| PF01336.20 | tRNA_anti-codon | 2 |
| PF13868.1  | Trichoplein     | 2 |
| PF02358.11 | Trehalose_PPase | 2 |
| PF13848.1  | Thioredoxin_6   | 2 |
| PF01925.14 | TauE            | 2 |
| PF02383.13 | Syja_N          | 2 |
| PF10266.4  | Strumpellin     | 2 |
| PF01852.14 | START           | 2 |
| PF07228.7  | SpoIIE          | 2 |
| PF09335.6  | SNARE_assoc     | 2 |
| PF01713.16 | Smr             | 2 |
| PF01380.17 | SIS             | 2 |
| PF02146.12 | SIR2            | 2 |
| PF00856.23 | SET             | 2 |
| PF00735.13 | Septin          | 2 |
| PF01365.16 | RYDR_ITPR       | 2 |
| PF08454.6  | RIH_assoc       | 2 |
| PF14666.1  | RICTOR_M        | 2 |
| PF09409.5  | PUB             | 2 |
| PF01416.15 | PseudoU_synth_1 | 2 |
| PF01619.13 | Pro_dh          | 2 |
| PF14844.1  | PH_BEACH        | 2 |
| PF14593.1  | PH_3            | 2 |
| PF00162.14 | PGK             | 2 |
| PF00326.16 | Peptidase_S9    | 2 |
| PF07998.6  | Peptidase_M54   | 2 |
| PF01434.13 | Peptidase_M41   | 2 |
| PF00644.15 | PARP            | 2 |
| PF04926.10 | PAP_RNA-bind    | 2 |
| PF03828.14 | PAP_assoc       | 2 |
| PF07034.6  | ORC3_N          | 2 |
| PF14775.1  | NYD-SP28_assoc  | 2 |
| PF01189.12 | Noll_Nop2_Fmu   | 2 |
| PF00999.16 | Na_H_Exchanger  | 2 |
| PF01699.19 | Na_Ca_ex        | 2 |
| PF06602.9  | Myotub-related  | 2 |
| PF05192.13 | MutS_III        | 2 |

|            |                 |   |
|------------|-----------------|---|
| PF04117.7  | Mpv17_PMP22     | 2 |
| PF08569.6  | Mo25            | 2 |
| PF02854.14 | MIF4G           | 2 |
| PF08241.7  | Methyltransf_11 | 2 |
| PF02820.13 | MBT             | 2 |
| PF00917.21 | MATH            | 2 |
| PF01554.13 | MatE            | 2 |
| PF00390.14 | malic           | 2 |
| PF13504.1  | LRR_7           | 2 |
| PF13385.1  | Laminin_G_3     | 2 |
| PF12706.2  | Lactamase_B_2   | 2 |
| PF00467.24 | KOW             | 2 |
| PF13964.1  | Kelch_6         | 2 |
| PF12309.3  | KBP_C           | 2 |
| PF02375.12 | JmjN            | 2 |
| PF01398.16 | JAB             | 2 |
| PF03810.14 | IBN_N           | 2 |
| PF00447.12 | HSF_DNA-bind    | 2 |
| PF00046.24 | Homeobox        | 2 |
| PF02985.17 | HEAT            | 2 |
| PF03144.20 | GTP_EFTU_D2     | 2 |
| PF00043.20 | GST_C           | 2 |
| PF02893.15 | GRAM            | 2 |
| PF11904.3  | GPCR_chapero_1  | 2 |
| PF00462.19 | Glutaredoxin    | 2 |
| PF02685.11 | Glucokinase     | 2 |
| PF01590.21 | GAF             | 2 |
| PF02687.16 | FtsX            | 2 |
| PF00258.20 | Flavodoxin_1    | 2 |
| PF02181.18 | FH2             | 2 |
| PF02259.18 | FAT             | 2 |
| PF00667.15 | FAD_binding_1   | 2 |
| PF11838.3  | ERAP1_C         | 2 |
| PF01105.19 | EMP24_GP25L     | 2 |
| PF00350.18 | Dynamin_N       | 2 |
| PF05277.7  | DUF726          | 2 |
| PF05018.8  | DUF667          | 2 |
| PF15239.1  | DUF4586         | 2 |
| PF12394.3  | DUF3657         | 2 |
| PF11618.3  | DUF3250         | 2 |
| PF09320.6  | DUF1977         | 2 |
| PF08590.5  | DUF1771         | 2 |
| PF14671.1  | DSPn            | 2 |
| PF05186.8  | Dpy-30          | 2 |
| PF08781.5  | DP              | 2 |
| PF04118.9  | Dopey_N         | 2 |

|            |                 |   |
|------------|-----------------|---|
| PF00684.14 | DnaJ_CXXCXGXXG  | 2 |
| PF03104.14 | DNA_pol_B_exo1  | 2 |
| PF00136.16 | DNA_pol_B       | 2 |
| PF01612.15 | DNA_pol_A_exo1  | 2 |
| PF08385.7  | DHC_N1          | 2 |
| PF06733.10 | DEAD_2          | 2 |
| PF00781.19 | DAGK_cat        | 2 |
| PF01467.21 | CTP_transf_2    | 2 |
| PF00118.19 | Cpn60_TCP1      | 2 |
| PF00188.21 | CAP             | 2 |
| PF04857.15 | CAF1            | 2 |
| PF00170.16 | bZIP_1          | 2 |
| PF10996.3  | Beta-Casp       | 2 |
| PF13229.1  | Beta_helix      | 2 |
| PF14781.1  | BBS2_N          | 2 |
| PF14783.1  | BBS2_Mid        | 2 |
| PF14782.1  | BBS2_C          | 2 |
| PF01145.20 | Band_7          | 2 |
| PF04377.10 | ATE_C           | 2 |
| PF00026.18 | Asp             | 2 |
| PF02752.17 | Arrestin_C      | 2 |
| PF11527.3  | ARL2_Bind_BART  | 2 |
| PF04108.7  | APG17           | 2 |
| PF13857.1  | Ank_5           | 2 |
| PF13606.1  | Ank_3           | 2 |
| PF01425.16 | Amidase         | 2 |
| PF14469.1  | AKAP28          | 2 |
| PF00406.17 | ADK             | 2 |
| PF00106.20 | adh_short       | 2 |
| PF02770.14 | Acyl-CoA_dh_M   | 2 |
| PF13508.1  | Acetyltransf_7  | 2 |
| PF13000.2  | Acatn           | 2 |
| PF12697.2  | Abhydrolase_6   | 2 |
| PF13238.1  | AAA_18          | 2 |
| PF02872.13 | 5_nucleotid_C   | 2 |
| PF00173.23 | Cyt-b5          | 1 |
| PF00534.15 | Glycos_transf_1 | 1 |
| PF00561.15 | Abhydrolase_1   | 1 |
| PF00929.19 | RNase_T         | 1 |
| PF00994.19 | MoCF_biosynth   | 1 |
| PF01648.15 | ACPS            | 1 |
| PF01687.12 | Flavokinase     | 1 |
| PF01753.13 | zf-MYND         | 1 |
| PF01757.17 | Acyl_transf_3   | 1 |
| PF01764.20 | Lipase_3        | 1 |
| PF02170.17 | PAZ             | 1 |

|            |                 |   |
|------------|-----------------|---|
| PF02171.12 | Piwi            | 1 |
| PF02197.12 | RIIa            | 1 |
| PF02207.15 | zf-UBR          | 1 |
| PF02798.15 | GST_N           | 1 |
| PF02902.14 | Peptidase_C48   | 1 |
| PF02928.11 | zf-C5HC2        | 1 |
| PF02984.14 | Cyclin_C        | 1 |
| PF03351.12 | DOMON           | 1 |
| PF03453.12 | MoeA_N          | 1 |
| PF03454.10 | MoeA_C          | 1 |
| PF03798.11 | TRAM_LAG1_CLN8  | 1 |
| PF04083.11 | Abhydro_lipase  | 1 |
| PF04101.11 | Glyco_tran_28_C | 1 |
| PF05030.7  | SSXT            | 1 |
| PF06432.6  | GPI2            | 1 |
| PF08059.8  | SEP             | 1 |
| PF08323.6  | Glyco_transf_5  | 1 |
| PF08542.6  | Rep_fac_C       | 1 |
| PF11934.3  | DUF3452         | 1 |
| PF13177.1  | DNA_pol3_delta2 | 1 |
| PF14749.1  | Acyl-CoA_ox_N   | 1 |
| PF14835.1  | zf-RING_6       | 1 |
| PF14634.1  | zf-RING_5       | 1 |
| PF12874.2  | zf-met          | 1 |
| PF13832.1  | zf-HC5HC2H_2    | 1 |
| PF13917.1  | zf-CCHC_3       | 1 |
| PF13696.1  | zf-CCHC_2       | 1 |
| PF01396.14 | zf-C4_Topoiso   | 1 |
| PF13923.1  | zf-C3HC4_2      | 1 |
| PF08265.6  | YL1_C           | 1 |
| PF00867.13 | XPG_I           | 1 |
| PF03007.11 | WES_acyltransf  | 1 |
| PF14745.1  | WASH-7_N        | 1 |
| PF14744.1  | WASH-7_mid      | 1 |
| PF14746.1  | WASH-7_C        | 1 |
| PF13519.1  | VWA_2           | 1 |
| PF05008.10 | V-SNARE         | 1 |
| PF02204.13 | VPS9            | 1 |
| PF07928.7  | Vps54           | 1 |
| PF04100.7  | Vps53_N         | 1 |
| PF04129.7  | Vps52           | 1 |
| PF08700.6  | Vps51           | 1 |
| PF09336.5  | Vps4_C          | 1 |
| PF09454.5  | Vps23_core      | 1 |
| PF04841.8  | Vps16_N         | 1 |
| PF04840.7  | Vps16_C         | 1 |



|            |                |   |
|------------|----------------|---|
| PF08487.5  | VIT            | 1 |
| PF11916.3  | Vac14_Fig4_bd  | 1 |
| PF08625.6  | Utp13          | 1 |
| PF00179.21 | UQ_con         | 1 |
| PF10408.4  | Ufd2P_core     | 1 |
| PF03152.9  | UFD1           | 1 |
| PF05743.8  | UEV            | 1 |
| PF01704.13 | UDPGP          | 1 |
| PF03456.13 | uDENN          | 1 |
| PF09358.5  | UBA_e1_C       | 1 |
| PF14555.1  | UBA_4          | 1 |
| PF11717.3  | Tudor-knot     | 1 |
| PF06011.7  | TRP            | 1 |
| PF00152.15 | tRNA-synt_2    | 1 |
| PF00749.16 | tRNA-synt_1c   | 1 |
| PF00579.20 | tRNA-synt_1b   | 1 |
| PF04073.10 | tRNA_edit      | 1 |
| PF12739.2  | TRAPPC-Trs85   | 1 |
| PF13176.1  | TPR_7          | 1 |
| PF02919.10 | Topoisom_I_N   | 1 |
| PF01028.15 | Topoisom_I     | 1 |
| PF14370.1  | Topo_C_assoc   | 1 |
| PF07810.8  | TMC            | 1 |
| PF13905.1  | Thioredoxin_8  | 1 |
| PF00899.16 | ThiF           | 1 |
| PF02882.14 | THF_DHG_CYH_C  | 1 |
| PF00763.18 | THF_DHG_CYH    | 1 |
| PF02291.10 | TFIID-31kDa    | 1 |
| PF12612.3  | TFCD_C         | 1 |
| PF03849.9  | Tfb2           | 1 |
| PF10193.4  | Telomere_reg-2 | 1 |
| PF12009.3  | Telomerase_RBD | 1 |
| PF03645.8  | Tctex-1        | 1 |
| PF07986.7  | TBCC           | 1 |
| PF08231.7  | SYF2           | 1 |
| PF03015.14 | Sterile        | 1 |
| PF00319.13 | SRF-TF         | 1 |
| PF00494.14 | SQS_PSY        | 1 |
| PF03439.8  | Spt5-NGN       | 1 |
| PF00588.14 | SpoU_methylase | 1 |
| PF04855.7  | SNF5           | 1 |
| PF00209.13 | SNF            | 1 |
| PF05739.14 | SNARE          | 1 |
| PF14938.1  | SNAP           | 1 |
| PF02463.14 | SMC_N          | 1 |
| PF09111.5  | SLIDE          | 1 |

|            |                 |   |
|------------|-----------------|---|
| PF06046.8  | Sec6            | 1 |
| PF04811.10 | Sec23_trunk     | 1 |
| PF08033.7  | Sec23_BS        | 1 |
| PF00995.18 | Sec1            | 1 |
| PF05285.7  | SDA1            | 1 |
| PF03803.10 | Scramblase      | 1 |
| PF04499.10 | SAPS            | 1 |
| PF07647.12 | SAM_2           | 1 |
| PF00536.25 | SAM_1           | 1 |
| PF03399.11 | SAC3_GANP       | 1 |
| PF02265.11 | S1-P1_nuclease  | 1 |
| PF05773.17 | RWD             | 1 |
| PF00078.22 | RVT_1           | 1 |
| PF13967.1  | RSN1_TM         | 1 |
| PF13893.1  | RRM_5           | 1 |
| PF14700.1  | RPOL_N          | 1 |
| PF01876.11 | RNase_P_p30     | 1 |
| PF01351.13 | RNase_HII       | 1 |
| PF00940.14 | RNA_pol         | 1 |
| PF09414.5  | RNA_ligase      | 1 |
| PF07521.7  | RMMBL           | 1 |
| PF14668.1  | RICTOR_V        | 1 |
| PF01778.12 | Ribosomal_L28e  | 1 |
| PF00636.21 | Ribonuclease_3  | 1 |
| PF00581.15 | Rhodanese       | 1 |
| PF08519.7  | RFC1            | 1 |
| PF04851.10 | ResIII          | 1 |
| PF05183.7  | RdRP            | 1 |
| PF12234.3  | Rav1p_C         | 1 |
| PF14663.1  | RasGEF_N_2      | 1 |
| PF08771.6  | Rapamycin_bind  | 1 |
| PF06098.6  | Radial_spoke_3  | 1 |
| PF08423.6  | Rad51           | 1 |
| PF03215.10 | Rad17           | 1 |
| PF07992.9  | Pyr_redox_2     | 1 |
| PF14306.1  | PUA_2           | 1 |
| PF02666.10 | PS_Dcarbxyase   | 1 |
| PF08799.6  | PRP4            | 1 |
| PF03371.10 | PRP38           | 1 |
| PF09785.4  | Prp31_C         | 1 |
| PF06991.6  | Prp19_bind      | 1 |
| PF02840.10 | Prp18           | 1 |
| PF00432.16 | Prenyltrans     | 1 |
| PF14895.1  | PPPI_inhib      | 1 |
| PF02765.12 | POT1            | 1 |
| PF03900.10 | Porphobil_deamC | 1 |

|            |                 |   |
|------------|-----------------|---|
| PF01379.15 | Porphobil_deam  | 1 |
| PF00348.12 | polyprenyl_synt | 1 |
| PF13091.1  | PLDc_2          | 1 |
| PF08190.7  | PIH1            | 1 |
| PF05721.8  | PhyH            | 1 |
| PF13831.1  | PHD_2           | 1 |
| PF00628.24 | PHD             | 1 |
| PF04757.9  | Pex2_Pex12      | 1 |
| PF08634.5  | Pet127          | 1 |
| PF01435.13 | Peptidase_M48   | 1 |
| PF00557.19 | Peptidase_M24   | 1 |
| PF00675.15 | Peptidase_M16   | 1 |
| PF13529.1  | Peptidase_C39_2 | 1 |
| PF01088.16 | Peptidase_C12   | 1 |
| PF13599.1  | Pentapeptide_4  | 1 |
| PF00805.17 | Pentapeptide    | 1 |
| PF01804.13 | Penicil_amidase | 1 |
| PF00564.19 | PB1             | 1 |
| PF05028.9  | PARG_cat        | 1 |
| PF14874.1  | PapD-like       | 1 |
| PF14738.1  | PaaSYMP         | 1 |
| PF00067.17 | p450            | 1 |
| PF04045.9  | P34-Arc         | 1 |
| PF05517.7  | p25-alpha       | 1 |
| PF02338.14 | OTU             | 1 |
| PF14418.1  | OHA             | 1 |
| PF03800.9  | Nuf2            | 1 |
| PF00293.23 | NUDIX           | 1 |
| PF08159.7  | NUC153          | 1 |
| PF08158.7  | NUC130_3NT      | 1 |
| PF10358.4  | NT-C2           | 1 |
| PF08060.8  | NOSIC           | 1 |
| PF01798.13 | Nop             | 1 |
| PF08155.6  | NOGCT           | 1 |
| PF06858.9  | NOG1            | 1 |
| PF07540.6  | NOC3p           | 1 |
| PF04981.8  | NMD3            | 1 |
| PF09797.4  | NatB_MDM20      | 1 |
| PF07993.7  | NAD_binding_4   | 1 |
| PF15508.1  | NAAA-beta       | 1 |
| PF00063.16 | Myosin_head     | 1 |
| PF14646.1  | MYCBPAP         | 1 |
| PF11831.3  | Myb_Cef         | 1 |
| PF11978.3  | MVP_shoulder    | 1 |
| PF01624.15 | MutS_I          | 1 |
| PF03972.9  | MmgE_PrpD       | 1 |

|            |                 |   |
|------------|-----------------|---|
| PF13012.1  | MitMem_reg      | 1 |
| PF00230.15 | MIP             | 1 |
| PF09088.6  | MIF4G_like      | 1 |
| PF02636.12 | Methyltransf_28 | 1 |
| PF13489.1  | Methyltransf_23 | 1 |
| PF12847.2  | Methyltransf_18 | 1 |
| PF08711.6  | Med26           | 1 |
| PF00493.18 | MCM             | 1 |
| PF05292.6  | MCD             | 1 |
| PF04188.8  | Mannosyl_trans2 | 1 |
| PF03949.10 | Malic_M         | 1 |
| PF04874.9  | Mak16           | 1 |
| PF15294.1  | Leu_zip         | 1 |
| PF07766.8  | LETM1           | 1 |
| PF06421.7  | LepA_C          | 1 |
| PF15619.1  | Lebercilin      | 1 |
| PF05147.8  | LANC_like       | 1 |
| PF03731.10 | Ku_N            | 1 |
| PF03730.9  | Ku_C            | 1 |
| PF02735.11 | Ku              | 1 |
| PF09762.4  | KOG2701         | 1 |
| PF12423.3  | KIF1B           | 1 |
| PF14714.1  | KH_dom-like     | 1 |
| PF13925.1  | Katanin_con80   | 1 |
| PF05804.7  | KAP             | 1 |
| PF01156.14 | IU_nuc_hydro    | 1 |
| PF06246.7  | Isyl            | 1 |
| PF08709.6  | Ins145_P3_rec   | 1 |
| PF05770.6  | Ins134_P3_kin   | 1 |
| PF01652.13 | IF4E            | 1 |
| PF08461.5  | HTH_12          | 1 |
| PF01627.18 | Hpt             | 1 |
| PF00368.13 | HMG-CoA_red     | 1 |
| PF09011.5  | HMG_box_2       | 1 |
| PF03006.15 | HlyIII          | 1 |
| PF14520.1  | HHH_5           | 1 |
| PF13625.1  | Helicase_C_3    | 1 |
| PF13307.1  | Helicase_C_2    | 1 |
| PF13646.1  | HEAT_2          | 1 |
| PF01966.17 | HD              | 1 |
| PF14661.1  | HAUS6_N         | 1 |
| PF01725.11 | Ham1p_like      | 1 |
| PF08152.7  | GUCT            | 1 |
| PF03199.10 | GSH_synthase    | 1 |
| PF03917.12 | GSH_synth_ATP   | 1 |
| PF07919.7  | Gryzun          | 1 |

|            |                |   |
|------------|----------------|---|
| PF01465.15 | GRIP           | 1 |
| PF10192.4  | GpcrRhopsn4    | 1 |
| PF12656.2  | G-patch_2      | 1 |
| PF00274.14 | Glycolytic     | 1 |
| PF01074.17 | Glyco_hydro_38 | 1 |
| PF04960.10 | Glutaminase    | 1 |
| PF04828.9  | GFA            | 1 |
| PF00626.17 | Gelsolin       | 1 |
| PF03009.12 | GDPD           | 1 |
| PF01571.16 | GCV_T          | 1 |
| PF03074.11 | GCS            | 1 |
| PF13537.1  | GATase_7       | 1 |
| PF03127.9  | GAT            | 1 |
| PF02187.12 | GAS2           | 1 |
| PF04410.9  | Gar1           | 1 |
| PF13492.1  | GAF_3          | 1 |
| PF03630.9  | Fumble         | 1 |
| PF11817.3  | Foie-gras_1    | 1 |
| PF00041.16 | fn3            | 1 |
| PF00254.23 | FKBP_C         | 1 |
| PF00630.14 | Filamin        | 1 |
| PF08151.7  | FerI           | 1 |
| PF00646.28 | F-box          | 1 |
| PF00487.19 | FA_desaturase  | 1 |
| PF00754.20 | F5_F8_type_C   | 1 |
| PF10256.4  | Erf4           | 1 |
| PF02732.10 | ERCC4          | 1 |
| PF00113.17 | Enolase_C      | 1 |
| PF03764.13 | EFG_IV         | 1 |
| PF14492.1  | EFG_II         | 1 |
| PF00679.19 | EFG_C          | 1 |
| PF00676.15 | E1_dh          | 1 |
| PF13815.1  | Dzip-like_N    | 1 |
| PF04912.9  | Dynamitin      | 1 |
| PF00692.14 | dUTPase        | 1 |
| PF06067.6  | DUF932         | 1 |
| PF05664.6  | DUF810         | 1 |
| PF04950.7  | DUF663         | 1 |
| PF15261.1  | DUF4591        | 1 |
| PF14908.1  | DUF4496        | 1 |
| PF14858.1  | DUF4486        | 1 |
| PF14846.1  | DUF4485        | 1 |
| PF14644.1  | DUF4456        | 1 |
| PF14643.1  | DUF4455        | 1 |
| PF14237.1  | DUF4339        | 1 |
| PF13821.1  | DUF4187        | 1 |

|            |                 |   |
|------------|-----------------|---|
| PF12842.2  | DUF3819         | 1 |
| PF10300.4  | DUF3808         | 1 |
| PF12166.3  | DUF3595         | 1 |
| PF12066.3  | DUF3546         | 1 |
| PF12022.3  | DUF3510         | 1 |
| PF11931.3  | DUF3449         | 1 |
| PF10474.4  | DUF2451         | 1 |
| PF10475.4  | DUF2450         | 1 |
| PF02995.12 | DUF229          | 1 |
| PF08217.6  | DUF1712         | 1 |
| PF08014.6  | DUF1704         | 1 |
| PF07713.8  | DUF1604         | 1 |
| PF06650.7  | DUF1162         | 1 |
| PF06565.7  | DUF1126         | 1 |
| PF06245.6  | DUF1015         | 1 |
| PF08123.8  | DOT1            | 1 |
| PF00476.15 | DNA_pol_A       | 1 |
| PF01119.14 | DNA_mis_repair  | 1 |
| PF04675.9  | DNA_ligase_A_N  | 1 |
| PF01068.16 | DNA_ligase_A_M  | 1 |
| PF04679.10 | DNA_ligase_A_C  | 1 |
| PF06584.8  | DIRP            | 1 |
| PF00186.14 | DHFR_1          | 1 |
| PF10407.4  | Cytokin_check_N | 1 |
| PF04676.9  | CwfJ_C_2        | 1 |
| PF04677.10 | CwfJ_C_1        | 1 |
| PF01083.17 | Cutinase        | 1 |
| PF04145.10 | Ctr             | 1 |
| PF04442.9  | CtaG_Cox11      | 1 |
| PF00313.17 | CSD             | 1 |
| PF03765.10 | CRAL_TRIO_N     | 1 |
| PF03178.10 | CPSF_A          | 1 |
| PF08695.5  | Coa1            | 1 |
| PF02515.12 | CoA_transf_3    | 1 |
| PF12717.2  | Cnd1            | 1 |
| PF02487.12 | CLN3            | 1 |
| PF01086.12 | Clathrin_lg_ch  | 1 |
| PF01214.13 | CK_II_beta      | 1 |
| PF00385.19 | Chromo          | 1 |
| PF12624.2  | Chorein_N       | 1 |
| PF04968.7  | CHORD           | 1 |
| PF09295.5  | ChAPs           | 1 |
| PF00307.26 | CH              | 1 |
| PF15627.1  | CEP76-C2        | 1 |
| PF05995.7  | CDO_I           | 1 |
| PF05179.9  | CDC73           | 1 |

|            |                 |   |
|------------|-----------------|---|
| PF06203.9  | CCT             | 1 |
| PF15625.1  | CC2D2AN-C2      | 1 |
| PF00571.23 | CBS             | 1 |
| PF03914.12 | CBF             | 1 |
| PF00690.21 | Cation_ATPase_N | 1 |
| PF08683.6  | CAMSAP_CKK      | 1 |
| PF12265.3  | CAF1C_H4-bd     | 1 |
| PF09736.4  | Bud13           | 1 |
| PF04427.13 | Brix            | 1 |
| PF03099.14 | BPL_LplA_LipB   | 1 |
| PF00364.17 | Biotin_lipoyl   | 1 |
| PF09794.4  | Avl9            | 1 |
| PF06644.6  | ATP11           | 1 |
| PF01171.15 | ATP_bind_3      | 1 |
| PF09333.6  | ATG_C           | 1 |
| PF04376.8  | ATE_N           | 1 |
| PF01400.19 | Astacin         | 1 |
| PF00710.15 | Asparaginase    | 1 |
| PF04729.8  | ASF1_hist_chap  | 1 |
| PF02374.10 | ArsA_ATPase     | 1 |
| PF04959.8  | ARS2            | 1 |
| PF10208.4  | Armet           | 1 |
| PF03308.11 | ArgK            | 1 |
| PF10351.4  | Apt1            | 1 |
| PF01583.15 | APS_kinase      | 1 |
| PF01871.12 | AMMECR1         | 1 |
| PF09261.6  | Alpha-mann_mid  | 1 |
| PF00171.17 | Aldedh          | 1 |
| PF11559.3  | ADIP            | 1 |
| PF01602.15 | Adaptin_N       | 1 |
| PF00928.16 | Adap_comp_sub   | 1 |
| PF02771.11 | Acyl-CoA_dh_N   | 1 |
| PF00441.19 | Acyl-CoA_dh_1   | 1 |
| PF01756.14 | ACOX            | 1 |
| PF00583.19 | Acetyltransf_1  | 1 |
| PF12698.2  | ABC2_membrane_3 | 1 |
| PF12430.3  | ABA_GPCR        | 1 |
| PF13521.1  | AAA_28          | 1 |
| PF13207.1  | AAA_17          | 1 |
| PF01073.14 | 3Beta_HSD       | 1 |
| PF00198.18 | 2-oxoacid_dh    | 1 |

**Table S5. Distribution of PRF genes in KEGG pathway database**

| <b>Entry</b> | <b>Name</b>                                  | <b>Occurrence</b> |
|--------------|----------------------------------------------|-------------------|
| ko01100      | Metabolic pathways                           | 68                |
| ko01110      | Biosynthesis of secondary metabolites        | 27                |
| ko01130      | Biosynthesis of antibiotics                  | 22                |
| ko04151      | PI3K-Akt signaling pathway                   | 18                |
| ko03040      | Spliceosome                                  | 16                |
| ko04068      | FoxO signaling pathway                       | 15                |
| ko04910      | Insulin signaling pathway                    | 15                |
| ko00230      | Purine metabolism                            | 14                |
| ko04071      | Sphingolipid signaling pathway               | 14                |
| ko04114      | Oocyte meiosis                               | 14                |
| ko04144      | Endocytosis                                  | 14                |
| ko04152      | AMPK signaling pathway                       | 14                |
| ko04921      | Oxytocin signaling pathway                   | 14                |
| ko04931      | Insulin resistance                           | 14                |
| ko03420      | Nucleotide excision repair                   | 13                |
| ko04024      | cAMP signaling pathway                       | 13                |
| ko04110      | Cell cycle                                   | 13                |
| ko04113      | Meiosis - yeast                              | 13                |
| ko05200      | Pathways in cancer                           | 13                |
| ko05205      | Proteoglycans in cancer                      | 13                |
| ko01120      | Microbial metabolism in diverse environments | 12                |
| ko04010      | MAPK signaling pathway                       | 12                |
| ko04022      | cGMP-PKG signaling pathway                   | 12                |
| ko04111      | Cell cycle - yeast                           | 12                |
| ko04141      | Protein processing in endoplasmic reticulum  | 12                |
| ko04150      | mTOR signaling pathway                       | 12                |
| ko04261      | Adrenergic signaling in cardiomyocytes       | 12                |
| ko05164      | Influenza A                                  | 12                |
| ko05166      | HTLV-I infection                             | 12                |
| ko05169      | Epstein-Barr virus infection                 | 12                |
| ko05203      | Viral carcinogenesis                         | 12                |
| ko03015      | mRNA surveillance pathway                    | 11                |
| ko04070      | Phosphatidylinositol signaling system        | 11                |
| ko04120      | Ubiquitin mediated proteolysis               | 11                |
| ko04310      | Wnt signaling pathway                        | 11                |
| ko04666      | Fc gamma R-mediated phagocytosis             | 11                |
| ko04728      | Dopaminergic synapse                         | 11                |
| ko04810      | Regulation of actin cytoskeleton             | 11                |
| ko04919      | Thyroid hormone signaling pathway            | 11                |
| ko05231      | Choline metabolism in cancer                 | 11                |
| ko00562      | Inositol phosphate metabolism                | 10                |
| ko03008      | Ribosome biogenesis in eukaryotes            | 10                |
| ko04145      | Phagosome                                    | 10                |
| ko04270      | Vascular smooth muscle contraction           | 10                |



|         |                                                  |    |
|---------|--------------------------------------------------|----|
| ko04720 | Long-term potentiation                           | 10 |
| ko04722 | Neurotrophin signaling pathway                   | 10 |
| ko04914 | Progesterone-mediated oocyte maturation          | 10 |
| ko05230 | Central carbon metabolism in cancer              | 10 |
| ko01200 | Carbon metabolism                                | 9  |
| ko03430 | Mismatch repair                                  | 9  |
| ko04020 | Calcium signaling pathway                        | 9  |
| ko04066 | HIF-1 signaling pathway                          | 9  |
| ko04072 | Phospholipase D signaling pathway                | 9  |
| ko04510 | Focal adhesion                                   | 9  |
| ko04540 | Gap junction                                     | 9  |
| ko04611 | Platelet activation                              | 9  |
| ko04725 | Cholinergic synapse                              | 9  |
| ko05152 | Tuberculosis                                     | 9  |
| ko05162 | Measles                                          | 9  |
| ko05206 | MicroRNAs in cancer                              | 9  |
| ko05215 | Prostate cancer                                  | 9  |
| ko02020 | Two-component system                             | 8  |
| ko03013 | RNA transport                                    | 8  |
| ko03030 | DNA replication                                  | 8  |
| ko04012 | ErbB signaling pathway                           | 8  |
| ko04062 | Chemokine signaling pathway                      | 8  |
| ko04530 | Tight junction                                   | 8  |
| ko04750 | Inflammatory mediator regulation of TRP channels | 8  |
| ko04915 | Estrogen signaling pathway                       | 8  |
| ko04920 | Adipocytokine signaling pathway                  | 8  |
| ko04922 | Glucagon signaling pathway                       | 8  |
| ko05160 | Hepatitis C                                      | 8  |
| ko05168 | Herpes simplex infection                         | 8  |
| ko05213 | Endometrial cancer                               | 8  |
| ko00240 | Pyrimidine metabolism                            | 7  |
| ko01230 | Biosynthesis of amino acids                      | 7  |
| ko03018 | RNA degradation                                  | 7  |
| ko03460 | Fanconi anemia pathway                           | 7  |
| ko04015 | Rap1 signaling pathway                           | 7  |
| ko04146 | Peroxisome                                       | 7  |
| ko04380 | Osteoclast differentiation                       | 7  |
| ko04660 | T cell receptor signaling pathway                | 7  |
| ko04662 | B cell receptor signaling pathway                | 7  |
| ko04724 | Glutamatergic synapse                            | 7  |
| ko04912 | GnRH signaling pathway                           | 7  |
| ko04925 | Aldosterone synthesis and secretion              | 7  |
| ko05161 | Hepatitis B                                      | 7  |
| ko05210 | Colorectal cancer                                | 7  |
| ko05214 | Glioma                                           | 7  |
| ko00010 | Glycolysis / Gluconeogenesis                     | 6  |

|         |                                                          |   |
|---------|----------------------------------------------------------|---|
| ko04014 | Ras signaling pathway                                    | 6 |
| ko04140 | Regulation of autophagy                                  | 6 |
| ko04142 | Lysosome                                                 | 6 |
| ko04340 | Hedgehog signaling pathway                               | 6 |
| ko04370 | VEGF signaling pathway                                   | 6 |
| ko04390 | Hippo signaling pathway                                  | 6 |
| ko04391 | Hippo signaling pathway - fly                            | 6 |
| ko04664 | Fc epsilon RI signaling pathway                          | 6 |
| ko04668 | TNF signaling pathway                                    | 6 |
| ko04713 | Circadian entrainment                                    | 6 |
| ko04726 | Serotonergic synapse                                     | 6 |
| ko04911 | Insulin secretion                                        | 6 |
| ko04916 | Melanogenesis                                            | 6 |
| ko04923 | Regulation of lipolysis in adipocytes                    | 6 |
| ko04930 | Type II diabetes mellitus                                | 6 |
| ko04932 | Non-alcoholic fatty liver disease (NAFLD)                | 6 |
| ko04962 | Vasopressin-regulated water reabsorption                 | 6 |
| ko04970 | Salivary secretion                                       | 6 |
| ko05010 | Alzheimer's disease                                      | 6 |
| ko05016 | Huntington's disease                                     | 6 |
| ko05132 | Salmonella infection                                     | 6 |
| ko05145 | Toxoplasmosis                                            | 6 |
| ko05221 | Acute myeloid leukemia                                   | 6 |
| ko00071 | Fatty acid degradation                                   | 5 |
| ko00520 | Amino sugar and nucleotide sugar metabolism              | 5 |
| ko00900 | Terpenoid backbone biosynthesis                          | 5 |
| ko00970 | Aminoacyl-tRNA biosynthesis                              | 5 |
| ko03022 | Basal transcription factors                              | 5 |
| ko03440 | Homologous recombination                                 | 5 |
| ko04210 | Apoptosis                                                | 5 |
| ko04350 | TGF-beta signaling pathway                               | 5 |
| ko04550 | Signaling pathways regulating pluripotency of stem cells | 5 |
| ko04723 | Retrograde endocannabinoid signaling                     | 5 |
| ko04730 | Long-term depression                                     | 5 |
| ko04917 | Prolactin signaling pathway                              | 5 |
| ko04924 | Renin secretion                                          | 5 |
| ko04972 | Pancreatic secretion                                     | 5 |
| ko04976 | Bile secretion                                           | 5 |
| ko05031 | Amphetamine addiction                                    | 5 |
| ko05032 | Morphine addiction                                       | 5 |
| ko05034 | Alcoholism                                               | 5 |
| ko05110 | Vibrio cholerae infection                                | 5 |
| ko05130 | Pathogenic Escherichia coli infection                    | 5 |
| ko05131 | Shigellosis                                              | 5 |
| ko05134 | Legionellosis                                            | 5 |
| ko05212 | Pancreatic cancer                                        | 5 |

|         |                                                           |   |
|---------|-----------------------------------------------------------|---|
| ko05218 | Melanoma                                                  | 5 |
| ko05223 | Non-small cell lung cancer                                | 5 |
| ko00260 | Glycine, serine and threonine metabolism                  | 4 |
| ko00310 | Lysine degradation                                        | 4 |
| ko00480 | Glutathione metabolism                                    | 4 |
| ko00500 | Starch and sucrose metabolism                             | 4 |
| ko01212 | Fatty acid metabolism                                     | 4 |
| ko03320 | PPAR signaling pathway                                    | 4 |
| ko04115 | p53 signaling pathway                                     | 4 |
| ko04520 | Adherens junction                                         | 4 |
| ko04620 | Toll-like receptor signaling pathway                      | 4 |
| ko04650 | Natural killer cell mediated cytotoxicity                 | 4 |
| ko04670 | Leukocyte transendothelial migration                      | 4 |
| ko04721 | Synaptic vesicle cycle                                    | 4 |
| ko04727 | GABAergic synapse                                         | 4 |
| ko04745 | Phototransduction - fly                                   | 4 |
| ko04960 | Aldosterone-regulated sodium reabsorption                 | 4 |
| ko04971 | Gastric acid secretion                                    | 4 |
| ko05020 | Prion diseases                                            | 4 |
| ko05100 | Bacterial invasion of epithelial cells                    | 4 |
| ko05142 | Chagas disease (American trypanosomiasis)                 | 4 |
| ko05211 | Renal cell carcinoma                                      | 4 |
| ko05220 | Chronic myeloid leukemia                                  | 4 |
| ko05222 | Small cell lung cancer                                    | 4 |
| ko00250 | Alanine, aspartate and glutamate metabolism               | 3 |
| ko00270 | Cysteine and methionine metabolism                        | 3 |
| ko00280 | Valine, leucine and isoleucine degradation                | 3 |
| ko00330 | Arginine and proline metabolism                           | 3 |
| ko00360 | Phenylalanine metabolism                                  | 3 |
| ko00510 | N-Glycan biosynthesis                                     | 3 |
| ko00513 | Various types of N-glycan biosynthesis                    | 3 |
| ko00620 | Pyruvate metabolism                                       | 3 |
| ko00670 | One carbon pool by folate                                 | 3 |
| ko00680 | Methane metabolism                                        | 3 |
| ko00860 | Porphyrin and chlorophyll metabolism                      | 3 |
| ko02010 | ABC transporters                                          | 3 |
| ko03410 | Base excision repair                                      | 3 |
| ko04075 | Plant hormone signal transduction                         | 3 |
| ko04320 | Dorso-ventral axis formation                              | 3 |
| ko04360 | Axon guidance                                             | 3 |
| ko04626 | Plant-pathogen interaction                                | 3 |
| ko04630 | Jak-STAT signaling pathway                                | 3 |
| ko04710 | Circadian rhythm                                          | 3 |
| ko04740 | Olfactory transduction                                    | 3 |
| ko04918 | Thyroid hormone synthesis                                 | 3 |
| ko04961 | Endocrine and other factor-regulated calcium reabsorption | 3 |

|         |                                                            |   |
|---------|------------------------------------------------------------|---|
| ko05012 | Parkinson's disease                                        | 3 |
| ko05146 | Amoebiasis                                                 | 3 |
| ko05414 | Dilated cardiomyopathy                                     | 3 |
| ko00061 | Fatty acid biosynthesis                                    | 2 |
| ko00130 | Ubiquinone and other terpenoid-quinone biosynthesis        | 2 |
| ko00190 | Oxidative phosphorylation                                  | 2 |
| ko00220 | Arginine biosynthesis                                      | 2 |
| ko00350 | Tyrosine metabolism                                        | 2 |
| ko00380 | Tryptophan metabolism                                      | 2 |
| ko00400 | Phenylalanine, tyrosine and tryptophan biosynthesis        | 2 |
| ko00401 | Novobiocin biosynthesis                                    | 2 |
| ko00450 | Selenocompound metabolism                                  | 2 |
| ko00564 | Glycerophospholipid metabolism                             | 2 |
| ko00600 | Sphingolipid metabolism                                    | 2 |
| ko00710 | Carbon fixation in photosynthetic organisms                | 2 |
| ko00903 | Limonene and pinene degradation                            | 2 |
| ko00950 | Isoquinoline alkaloid biosynthesis                         | 2 |
| ko00960 | Tropane, piperidine and pyridine alkaloid biosynthesis     | 2 |
| ko03050 | Proteasome                                                 | 2 |
| ko03450 | Non-homologous end-joining                                 | 2 |
| ko04011 | MAPK signaling pathway - yeast                             | 2 |
| ko04013 | MAPK signaling pathway - fly                               | 2 |
| ko04064 | NF-kappa B signaling pathway                               | 2 |
| ko04330 | Notch signaling pathway                                    | 2 |
| ko04621 | NOD-like receptor signaling pathway                        | 2 |
| ko04711 | Circadian rhythm - fly                                     | 2 |
| ko04712 | Circadian rhythm - plant                                   | 2 |
| ko04913 | Ovarian steroidogenesis                                    | 2 |
| ko04973 | Carbohydrate digestion and absorption                      | 2 |
| ko05014 | Amyotrophic lateral sclerosis (ALS)                        | 2 |
| ko05120 | Epithelial cell signaling in Helicobacter pylori infection | 2 |
| ko05133 | Pertussis                                                  | 2 |
| ko05204 | Chemical carcinogenesis                                    | 2 |
| ko05216 | Thyroid cancer                                             | 2 |
| ko05219 | Bladder cancer                                             | 2 |
| ko05410 | Hypertrophic cardiomyopathy (HCM)                          | 2 |
| ko00020 | Citrate cycle (TCA cycle)                                  | 1 |
| ko00030 | Pentose phosphate pathway                                  | 1 |
| ko00040 | Pentose and glucuronate interconversions                   | 1 |
| ko00051 | Fructose and mannose metabolism                            | 1 |
| ko00052 | Galactose metabolism                                       | 1 |
| ko00053 | Ascorbate and aldarate metabolism                          | 1 |
| ko00062 | Fatty acid elongation                                      | 1 |
| ko00073 | Cutin, suberine and wax biosynthesis                       | 1 |
| ko00100 | Steroid biosynthesis                                       | 1 |
| ko00261 | Monobactam biosynthesis                                    | 1 |

|         |                                                       |   |
|---------|-------------------------------------------------------|---|
| ko00311 | Penicillin and cephalosporin biosynthesis             | 1 |
| ko00340 | Histidine metabolism                                  | 1 |
| ko00363 | Bisphenol degradation                                 | 1 |
| ko00410 | beta-Alanine metabolism                               | 1 |
| ko00430 | Taurine and hypotaurine metabolism                    | 1 |
| ko00440 | Phosphonate and phosphinate metabolism                | 1 |
| ko00460 | Cyanoamino acid metabolism                            | 1 |
| ko00471 | D-Glutamine and D-glutamate metabolism                | 1 |
| ko00511 | Other glycan degradation                              | 1 |
| ko00514 | Other types of O-glycan biosynthesis                  | 1 |
| ko00521 | Streptomycin biosynthesis                             | 1 |
| ko00524 | Butirosin and neomycin biosynthesis                   | 1 |
| ko00550 | Peptidoglycan biosynthesis                            | 1 |
| ko00561 | Glycerolipid metabolism                               | 1 |
| ko00563 | Glycosylphosphatidylinositol(GPI)-anchor biosynthesis | 1 |
| ko00592 | alpha-Linolenic acid metabolism                       | 1 |
| ko00604 | Glycosphingolipid biosynthesis - ganglio series       | 1 |
| ko00624 | Polycyclic aromatic hydrocarbon degradation           | 1 |
| ko00625 | Chloroalkane and chloroalkene degradation             | 1 |
| ko00627 | Aminobenzoate degradation                             | 1 |
| ko00630 | Glyoxylate and dicarboxylate metabolism               | 1 |
| ko00720 | Carbon fixation pathways in prokaryotes               | 1 |
| ko00740 | Riboflavin metabolism                                 | 1 |
| ko00760 | Nicotinate and nicotinamide metabolism                | 1 |
| ko00770 | Pantothenate and CoA biosynthesis                     | 1 |
| ko00785 | Lipoic acid metabolism                                | 1 |
| ko00790 | Folate biosynthesis                                   | 1 |
| ko00830 | Retinol metabolism                                    | 1 |
| ko00910 | Nitrogen metabolism                                   | 1 |
| ko00920 | Sulfur metabolism                                     | 1 |
| ko00945 | Stilbenoid, diarylheptanoid and gingerol biosynthesis | 1 |
| ko00980 | Metabolism of xenobiotics by cytochrome P450          | 1 |
| ko00982 | Drug metabolism - cytochrome P450                     | 1 |
| ko00983 | Drug metabolism - other enzymes                       | 1 |
| ko01040 | Biosynthesis of unsaturated fatty acids               | 1 |
| ko01210 | 2-Oxocarboxylic acid metabolism                       | 1 |
| ko04122 | Sulfur relay system                                   | 1 |
| ko04130 | SNARE interactions in vesicular transport             | 1 |
| ko04612 | Antigen processing and presentation                   | 1 |
| ko04622 | RIG-I-like receptor signaling pathway                 | 1 |
| ko04742 | Taste transduction                                    | 1 |
| ko04940 | Type I diabetes mellitus                              | 1 |
| ko04964 | Proximal tubule bicarbonate reclamation               | 1 |
| ko04966 | Collecting duct acid secretion                        | 1 |
| ko04974 | Protein digestion and absorption                      | 1 |
| ko04977 | Vitamin digestion and absorption                      | 1 |

|         |                                                        |   |
|---------|--------------------------------------------------------|---|
| ko04978 | Mineral absorption                                     | 1 |
| ko05030 | Cocaine addiction                                      | 1 |
| ko05140 | Leishmaniasis                                          | 1 |
| ko05202 | Transcriptional misregulation in cancer                | 1 |
| ko05217 | Basal cell carcinoma                                   | 1 |
| ko05323 | Rheumatoid arthritis                                   | 1 |
| ko05412 | Arrhythmogenic right ventricular cardiomyopathy (ARVC) | 1 |
| ko05416 | Viral myocarditis                                      | 1 |

**Table S6. The list of putative tRNAs of *Euplotes octocarinatus***

| Sequence Name | tRNA | tRNA Begin | Bounds End | tRNA Type | Anti Codon | Intron Begin | Bounds End | Cove Score |
|---------------|------|------------|------------|-----------|------------|--------------|------------|------------|
| Contig2146    | 1    | 2168       | 2239       | Thr       | TGT        | 0            | 0          | 45         |
| Contig2236    | 1    | 2659       | 2588       | Thr       | AGT        | 0            | 0          | 77.45      |
| Contig2371    | 1    | 343        | 415        | Val       | AAC        | 0            | 0          | 76.18      |
| Contig2971    | 1    | 1313       | 1243       | Phe       | GAA        | 0            | 0          | 42.05      |
| Contig3018    | 1    | 782        | 906        | Lys       | TTT        | 819          | 871        | 37.41      |
| Contig3410    | 1    | 787        | 858        | Phe       | GAA        | 0            | 0          | 54.7       |
| Contig6440    | 1    | 798        | 726        | Arg       | TCG        | 0            | 0          | 68.88      |
| Contig7341    | 1    | 145        | 225        | Leu       | CAA        | 0            | 0          | 69.41      |
| Contig7673    | 1    | 487        | 559        | Lys       | CTT        | 0            | 0          | 85.42      |
| Contig7885    | 1    | 671        | 743        | Arg       | CCG        | 0            | 0          | 60.52      |
| Contig8078    | 1    | 1412       | 1483       | Gly       | TCC        | 0            | 0          | 83.19      |
| Contig8190    | 1    | 307        | 378        | Lys       | TTT        | 0            | 0          | 87.11      |
| Contig8502    | 1    | 831        | 902        | Gly       | TCC        | 0            | 0          | 83.19      |
| Contig8850    | 1    | 477        | 548        | Cys       | GCA        | 0            | 0          | 76.11      |
| Contig10439   | 1    | 557        | 628        | Ala       | TGC        | 0            | 0          | 74.34      |
| Contig10641   | 1    | 172        | 94         | Leu       | AAG        | 0            | 0          | 70.46      |
| Contig12814   | 1    | 457        | 528        | Gln       | TTG        | 0            | 0          | 71.49      |
| Contig13077   | 1    | 283        | 353        | Undet     | ???        | 0            | 0          | 59.95      |
| Contig16875   | 1    | 168        | 97         | Gln       | CTG        | 0            | 0          | 68.88      |
| Contig19075   | 1    | 1908       | 1979       | Phe       | GAA        | 0            | 0          | 56.73      |
| Contig20134   | 1    | 731        | 809        | Leu       | TAG        | 0            | 0          | 74.41      |
| Contig20433   | 1    | 320        | 391        | Lys       | TTT        | 0            | 0          | 87.11      |
| Contig20964   | 1    | 164        | 93         | Pro       | CGG        | 0            | 0          | 76.25      |
| Contig20990   | 1    | 166        | 94         | Asn       | GTT        | 0            | 0          | 79.53      |
| Contig21001   | 1    | 229        | 300        | Glu       | CTC        | 0            | 0          | 64.99      |
| Contig21002   | 1    | 175        | 104        | Met       | CAT        | 0            | 0          | 66.22      |
| Contig21004   | 1    | 174        | 102        | Val       | TAC        | 0            | 0          | 78.31      |
| Contig21006   | 1    | 173        | 102        | Asp       | GTC        | 0            | 0          | 73.24      |
| Contig21038   | 1    | 468        | 539        | SeC       | TCA        | 0            | 0          | 63.83      |
| Contig21063   | 1    | 481        | 552        | Pro       | AGG        | 0            | 0          | 73.86      |
| Contig21088   | 1    | 174        | 102        | Glu       | CTC        | 0            | 0          | 74.73      |
| Contig21112   | 1    | 304        | 375        | Ala       | TGC        | 0            | 0          | 74.34      |
| Contig21263   | 1    | 191        | 119        | Arg       | CCT        | 0            | 0          | 64.53      |
| Contig21285   | 1    | 175        | 94         | Leu       | AAG        | 0            | 0          | 62.27      |
| Contig21316   | 1    | 190        | 108        | Ser       | GCT        | 0            | 0          | 74.17      |
| Contig21362   | 1    | 200        | 271        | His       | GTG        | 0            | 0          | 53.11      |
| Contig24862   | 1    | 2215       | 2137       | Leu       | CAG        | 0            | 0          | 71.98      |
| Contig25097   | 1    | 764        | 679        | Tyr       | GTA        | 727          | 715        | 71.93      |
| Contig26740   | 1    | 1198       | 1126       | Val       | TAC        | 0            | 0          | 52         |
| Contig27720   | 1    | 441        | 523        | Leu       | TAA        | 0            | 0          | 66.72      |

|             |   |      |      |       |     |     |     |       |
|-------------|---|------|------|-------|-----|-----|-----|-------|
| Contig29485 | 1 | 729  | 658  | Gly   | CCC | 0   | 0   | 78.2  |
| Contig29485 | 2 | 183  | 110  | Undet | ??? | 0   | 0   | 23.35 |
| Contig29505 | 1 | 2229 | 2307 | Leu   | AAG | 0   | 0   | 70.46 |
| Contig29511 | 1 | 164  | 92   | Arg   | TCG | 0   | 0   | 35.45 |
| Contig30280 | 1 | 20   | 92   | Met   | CAT | 0   | 0   | 75.15 |
| Contig30280 | 2 | 999  | 926  | Arg   | CCT | 0   | 0   | 69.01 |
| Contig32200 | 1 | 178  | 93   | Tyr   | GTA | 141 | 129 | 71.93 |
| Contig32248 | 1 | 324  | 397  | Arg   | TCT | 0   | 0   | 72.04 |
| Contig32382 | 1 | 503  | 432  | Lys   | TTT | 0   | 0   | 87.11 |
| Contig32580 | 1 | 2205 | 2127 | Leu   | CAG | 0   | 0   | 65.77 |
| Contig33447 | 1 | 535  | 606  | Thr   | AGT | 0   | 0   | 77.45 |
| Contig33508 | 1 | 265  | 338  | Lys   | TTT | 0   | 0   | 77.3  |
| Contig33553 | 1 | 436  | 365  | Glu   | TTC | 0   | 0   | 65.22 |
| Contig33585 | 1 | 482  | 555  | Met   | CAT | 0   | 0   | 58.47 |
| Contig33628 | 1 | 327  | 257  | Gly   | GCC | 0   | 0   | 62.73 |
| Contig33653 | 1 | 173  | 101  | Glu   | TTC | 0   | 0   | 73.11 |
| Contig33667 | 1 | 352  | 283  | Undet | ??? | 0   | 0   | 42.35 |
| Contig33731 | 1 | 158  | 87   | Val   | CAC | 0   | 0   | 50.69 |
| Contig33819 | 1 | 155  | 84   | Thr   | CGT | 0   | 0   | 72.5  |
| Contig34213 | 1 | 457  | 528  | Val   | CAC | 0   | 0   | 52.69 |
| Contig34254 | 1 | 373  | 453  | Leu   | TAG | 0   | 0   | 56.54 |
| Contig34482 | 1 | 326  | 399  | Arg   | TCT | 0   | 0   | 72.04 |
| Contig34502 | 1 | 382  | 462  | Leu   | TAA | 0   | 0   | 63.26 |
| Contig34518 | 1 | 335  | 407  | Trp   | CCA | 0   | 0   | 68.76 |
| Contig34522 | 1 | 158  | 87   | Leu   | CAA | 0   | 0   | 54.2  |
| Contig34579 | 1 | 149  | 79   | Leu   | CAG | 0   | 0   | 52.31 |
| Contig34628 | 1 | 187  | 115  | Arg   | ACG | 0   | 0   | 68.09 |
| Contig34652 | 1 | 304  | 375  | Gln   | TTG | 0   | 0   | 71.49 |
| Contig34700 | 1 | 319  | 391  | Ala   | AGC | 0   | 0   | 54.02 |
| Contig34704 | 1 | 319  | 391  | Ala   | AGC | 0   | 0   | 54.02 |
| Contig34760 | 1 | 166  | 94   | Phe   | GAA | 0   | 0   | 70.81 |
| Contig34775 | 1 | 179  | 107  | Ile   | TAT | 0   | 0   | 58.85 |
| Contig34792 | 1 | 312  | 384  | Trp   | CCA | 0   | 0   | 64.36 |
| Contig34794 | 1 | 317  | 236  | Ser   | CGA | 0   | 0   | 84.74 |
| Contig34811 | 1 | 293  | 364  | Ala   | CGC | 0   | 0   | 79.61 |
| Contig34821 | 1 | 289  | 370  | Ser   | TGA | 0   | 0   | 84.95 |
| Contig34822 | 1 | 291  | 372  | Ser   | AGA | 0   | 0   | 82.67 |
| Contig34823 | 1 | 166  | 94   | Met   | CAT | 0   | 0   | 73.55 |
| Contig34855 | 1 | 162  | 91   | Pro   | TGG | 0   | 0   | 75.72 |
| Contig34863 | 1 | 180  | 109  | Thr   | TGT | 0   | 0   | 79.74 |
| Contig34916 | 1 | 138  | 57   | Leu   | CAG | 0   | 0   | 64.43 |
| Contig34960 | 1 | 283  | 355  | Ile   | AAT | 0   | 0   | 81.9  |
| Contig34977 | 1 | 180  | 109  | Thr   | TGT | 0   | 0   | 79.74 |
| Contig34983 | 1 | 296  | 367  | Phe   | AAA | 0   | 0   | 76.6  |



---

|               |   |     |     |     |     |     |     |       |
|---------------|---|-----|-----|-----|-----|-----|-----|-------|
| Contig35058   | 1 | 273 | 345 | Ile | AAT | 0   | 0   | 81.9  |
| Contig35093   | 1 | 161 | 89  | Ile | TAT | 0   | 0   | 57.71 |
| Contig35145   | 1 | 275 | 346 | Ile | GAT | 0   | 0   | 64.45 |
| Contig35710   | 1 | 108 | 36  | Val | CAC | 0   | 0   | 80.77 |
| Contig36094   | 1 | 143 | 225 | Sup | TTA | 180 | 190 | 42.04 |
| Contig36987   | 1 | 83  | 154 | Lys | TTT | 0   | 0   | 84.34 |
| Contig37095   | 1 | 97  | 170 | Arg | CCG | 0   | 0   | 59.29 |
| Contig38952   | 1 | 89  | 16  | Arg | ACG | 0   | 0   | 74.62 |
| Contig39938   | 1 | 193 | 113 | Sup | TTA | 0   | 0   | 40.25 |
| Contig40166   | 1 | 119 | 190 | Glu | TTC | 0   | 0   | 67.82 |
| Contig4144533 | 1 | 171 | 85  | Tyr | GTA | 133 | 121 | 68.15 |

---

**Table S7. Properties of *ab initio* predicted genes**

| <b>Feature</b>             | <b>Number</b> | <b>Mean<br/>(bp)</b> | <b>Min<br/>(bp)</b> | <b>Max<br/>(bp)</b> | <b>%GC</b> |
|----------------------------|---------------|----------------------|---------------------|---------------------|------------|
| Genes                      | 24,883        | 1,724                | 309                 | 18,625              | 29.1       |
| Exons                      | 82,697        | 380                  | 3                   | 11,848              | 31.3       |
| Introns                    | 56,263        | 189                  | 25                  | 1,127               | 23.3       |
| CDS                        | 24,883        | 1,175                | 213                 | 18,342              | 31.9       |
| 5'upstream of start codon  | 21,692        | 372                  | 21                  | 9,043               | 21.6       |
| 3'downstream of stop codon | 21,692        | 331                  | 3                   | 10,489              | 21.6       |

Prediction features were obtained for complete non-PRF nanochromosomes (23,220 in total) only. Up- and downstream regions were only determined for single-gene nanochromosomes (21,692 in total). %GC estimates exclude telomeric bases.
